## ACTIVE $\text{HCO}_3^-$ SECRETION IN THE RECTAL SALT GLAND OF A MOSQUITO LARVA INHABITING $\text{NaHCO}_3\text{-CO}_3$ LAKES

BY K. STRANGE, J. E. PHILLIPS AND G. A. QUAMME

*Departments of Zoology\* and Medicine, University of British Columbia,  
Vancouver, British Columbia V6T 2A9, Canada*

(Received 24 February 1982 - Accepted 19 April 1982)

### SUMMARY

1. *Aedes dorsalis* larvae are one of the few organisms capable of inhabiting hypersaline  $\text{NaHCO}_3\text{-CO}_3$  lakes. Under laboratory conditions larvae can survive and develop normally in saline media with pH values of 10.5,  $\text{HCO}_3^-$  concentrations of 250 mM, or  $\text{CO}_3^{2-}$  concentrations of 100 mM.

2. Despite ingestion of alkaline media at a rate equal to 130% of larval body wt/day, these insects regulated haemolymph pH (7.55-7.70) and  $\text{HCO}_3^-$  concentration (8.0-18.5 mM) within narrow limits.

3. Analysis of fluid obtained by micropuncture or microcannulation indicated that rectal secretion is an important mechanism of pH and  $\text{HCO}_3^-$  regulation.

4. The lumen-to-haemocoel  $\text{HCO}_3^-$  and  $\text{CO}_3^{2-}$  gradients generated by isolated, microcannulated recta were 21:1 and 241:1, respectively.

5. Transepithelial potential in cannulated recta was -14.2 to -25.3 mV (lumen negative), demonstrating that net  $\text{HCO}_3^-$  secretion occurs against a large electrochemical gradient.

### INTRODUCTION

Hypersaline lakes found in arid regions of the world are among the most extreme natural aquatic environments known. The ionic composition of these lakes varies widely and can range from saturated brines with ion ratios similar to sea water to athalassohaline  $\text{MgSO}_4$ ,  $\text{Na}_2\text{SO}_4$  and  $\text{NaHCO}_3\text{-CO}_3$  lakes (Topping & Scudder, 1977). The latter group of lakes often have pH values exceeding 10 and  $\text{HCO}_3^-$  and  $\text{CO}_3^{2-}$  concentrations as high as 1-2.4 M (Blinn, 1969; Topping & Scudder, 1977). Only a few organisms are capable of surviving under these severe alkaline conditions, the most prominent of which are insects, crustaceans, halophilic bacteria and algae (Blinn, 1969; Scudder, 1969).

Little is known about the physiological adaptations which allow organisms to survive in these alkaline environments with the exception of recent work on the fish *Tilapia grahami* (Reite, Maloiy & Aasehaug, 1974; Johansen, Maloiy & Lykkeboe, 1975, Lykkeboe & Johansen, 1975; Maetz & DeRenzi, 1978; Maloiy *et al.* 1978). Previous studies in our laboratory (reviewed by Phillips & Bradley, 1977; Phillips, Bradley & Maddrell, 1978) have described the mechanisms responsible for regulating

\* The address to which reprint requests should be sent.

haemolymph  $\text{Na}^+$ ,  $\text{K}^+$ ,  $\text{Cl}^-$ ,  $\text{Mg}^{2+}$ ,  $\text{SO}_4^{2-}$  and osmotic concentration in mosquito larvae inhabiting salt lakes. However, the problems of  $\text{H}^+$  and  $\text{HCO}_3^-$  regulation in saltwater mosquito larvae, or indeed any other insect, have not been examined. The few previous studies of insect acid-base physiology were mainly concerned with determining haemolymph pH, buffering capacity and  $\text{CO}_2$  content under a single physiological condition (Craig & Clark, 1938; Hastings & Pepper, 1943; Levenbook, 1950*a,b*).

We have begun to investigate the mechanisms of insect pH and  $\text{HCO}_3^-$  regulation using *Aedes dorsalis* larvae which are normally found in alkaline salt lakes of western North America. In the present paper we determined the extremes of alkalinity under which larvae can develop normally and the extent of haemolymph pH and  $\text{HCO}_3^-$  regulation in these environments. We also show that the rectum is an important site of  $\text{HCO}_3^-$  excretion, as originally suggested by Bradley & Phillips (1977*a*), and we demonstrate that rectal  $\text{HCO}_3^-$  secretion occurs by an energy-requiring mechanism.

#### MATERIALS AND METHODS

*Aedes dorsalis* eggs were obtained from the Department of Biomedical and Environmental Health Sciences, University of California, Berkeley. Eggs were hatched as described previously (Bradley, 1976) and larvae were reared at 25 °C in an alkaline rearing medium (Table 1) resembling natural lake waters (Topping & Scudder, 1977). Larvae were fed daily with dry fish food (Tetramin Staple Food) and the rearing media were aerated gently and changed periodically to prevent stagnation. Maintenance of the colony was otherwise similar to that described by Bradley (1976).

Survival studies were conducted by abruptly transferring third and fourth instar larvae 4 days after hatching to media with high  $\text{HCO}_3^-$  and  $\text{CO}_3^{2-}/\text{Cl}_3^-$  ratios. Mortality and development of larvae were observed for four days after transfer. Based on these results three experimental media were chosen for use in the remainder of this study and are referred to as Rearing, 250 mM- $\text{HCO}_3^-$ , and 100 mM- $\text{CO}_3^{2-}$  medium (Table 1). All experiments were conducted on fourth-instar larvae acclimated to these artificial lake waters for at least 3 days.

Larval drinking rate was estimated at 25 °C using the [ $^{14}\text{C}$ ]inulin uptake method of Bradley & Phillips (1975). Samples of larval haemolymph were collected and  $\text{Na}^+$ ,  $\text{K}^+$ ,  $\text{Mg}^{2+}$ ,  $\text{Ca}^{2+}$ ,  $\text{Cl}^-$  and osmotic concentrations were measured as described by Bradley & Phillips (1975, 1977*b*).

Physiological salines (Table 2) used to bathe isolated recta were based on measured ionic and osmotic concentrations of natural haemolymph. Free amino acid concentrations in larval haemolymph were determined using a Beckman 118C automatic amino acid analyzer and the four major haemolymph amino acids were included in the salines at physiological concentrations. The large anion deficit observed in larval haemolymph was simulated by including sodium cyclamate in the salines. All salines were gassed with 98%  $\text{O}_2$ -2%  $\text{CO}_2$  to give a  $\text{CO}_2$  concentration similar to that measured in haemolymph (see Results).

*Capillary pH electrodes.* To minimize  $\text{CO}_2$  loss from samples of haemolymph and rectal secretion during pH measurements, ultramicro internal capillary pH electrodes

Table 1. *Composition of artificial lake waters in which larvae were reared or acclimated*

| Constituent (mM)              | Rearing medium | 250 mM-HCO <sub>3</sub> <sup>-</sup> medium | 100 mM-CO <sub>3</sub> <sup>2-</sup> medium |
|-------------------------------|----------------|---------------------------------------------|---------------------------------------------|
| Na <sup>+</sup>               | 361.50         | 361.50                                      | 398.00                                      |
| K <sup>+</sup>                | 2.50           | 2.50                                        | 2.50                                        |
| Ca <sup>2+</sup>              | 0.03           | 0.03                                        | 0.03                                        |
| Mg <sup>2+</sup>              | 0.50           | 0.50                                        | 0.50                                        |
| Cl <sup>-</sup>               | 246.06         | 39.56                                       | 97.06                                       |
| SO <sub>4</sub> <sup>2-</sup> | 10.00          | 10.00                                       | 10.00                                       |
| HCO <sub>3</sub> <sup>-</sup> | 43.50          | 250.00                                      | 87.00                                       |
| CO <sub>3</sub> <sup>2-</sup> | 29.00          | 29.00                                       | 100.00                                      |
| pH                            | 9.50           | 8.85                                        | 9.75                                        |
| m-osmol                       | 638.00         | 597.00                                      | 576.00                                      |

Table 2. *Composition of haemolymph (mean  $\pm$  S.E.,  $n = 6-10$ ) and physiological salines for larvae acclimated to different artificial lake waters*

(All three salines also contained the following (in mM): proline 20, alanine 5, glycine 3, glutamine 4, succinate 7.4, citrate 2.5, glucose 10.)

| Constituent (mM)              | Larval acclimation medium* |        |                                             |        |                                             |        |
|-------------------------------|----------------------------|--------|---------------------------------------------|--------|---------------------------------------------|--------|
|                               | Rearing medium             |        | 250 mM-HCO <sub>3</sub> <sup>-</sup> medium |        | 100 mM-CO <sub>3</sub> <sup>2-</sup> medium |        |
|                               |                            |        |                                             |        |                                             |        |
|                               | Haemolymph                 | Saline | Haemolymph                                  | Saline | Haemolymph                                  | Saline |
| Na <sup>+</sup>               | 163 $\pm$ 2.4              | 164.5  | 191 $\pm$ 7.2                               | 189.5  | 182 $\pm$ 2.0                               | 180    |
| K <sup>+</sup>                | 9.5 $\pm$ 0.7              | 9      | 9.4 $\pm$ 0.9                               | 9      | 11.7 $\pm$ 0.5                              | 9      |
| Mg <sup>2+</sup>              | 3.8 $\pm$ 0.2              | 4      | 4.8 $\pm$ 0.4                               | 4      | 5.5 $\pm$ 0.4                               | 4      |
| Ca <sup>2+</sup>              | 8.7 $\pm$ 0.5              | 4      | 12.7 $\pm$ 0.8                              | 4      | 14.2 $\pm$ 0.9                              | 4      |
| SO <sub>4</sub> <sup>2-</sup> | —                          | 5      | —                                           | 5      | —                                           | 5      |
| Cl <sup>-</sup>               | 56 $\pm$ 1.8               | 56     | 39.1 $\pm$ 2.3                              | 39     | 49 $\pm$ 1.6                                | 49     |
| Cyclamate                     | —                          | 89     | —                                           | 125    | —                                           | 108.5  |
| HCO <sub>3</sub> <sup>-</sup> | 8.1 $\pm$ 0.5              | 12.5   | 18.5 $\pm$ 0.6                              | 18.5   | 12.1 $\pm$ 0.3                              | 15.5   |
| pH                            | 7.55 $\pm$ 0.03            | 7.51   | 7.70 $\pm$ 0.02                             | 7.70   | 7.70 $\pm$ 0.02                             | 7.60   |
| m-osmol                       | 359 $\pm$ 1.5              | 380    | 432 $\pm$ 3                                 | 427    | 401 $\pm$ 12                                | 420    |

\* See Table 1 for composition of artificial lake waters.

were used (Fig. 1). These electrodes were modified from Khuri, Agulian & Harik (1968) and required a total sample volume of 10–30 nl.

Electrodes were calibrated at 25 °C in four buffers (pH 6.4–9.0) of constant ionic strength similar to that of natural haemolymph or rectal secretion. The pH of these buffers was determined before each experiment using a Radiometer Model 27 pH meter and Radiometer pH electrode calibrated with Radiometer buffers at 25 °C. Only electrodes with full response times of less than 60 s and a calibration curve slope of 55–61 mV/pH unit were used. The mean ( $\pm$  S.E.) calibration curve slope and correlation coefficient for all electrodes used throughout this study were  $58.32 \pm 0.19$  and  $1.00 \pm 0.00$  ( $n = 34$ ), respectively.

One difficulty experienced with these electrodes was a small downward drift of the voltage recorded in any calibration buffer after pH measurements on biological fluids. The cause of this drift was uncertain and could not be corrected by rinsing with chromic acid or by repeatedly 'exercising' the electrode in two buffers. To monitor

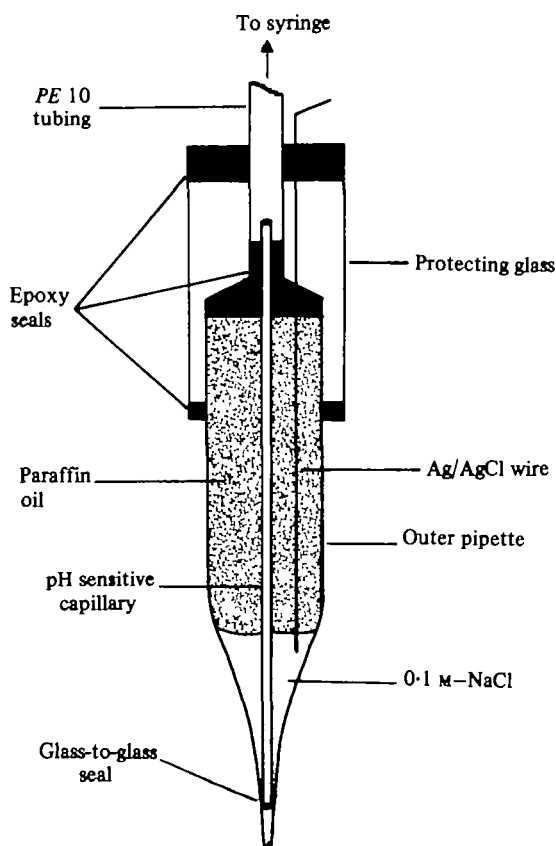

Fig. 1. Ultramicro internal capillary pH electrode.

this problem, electrodes were recalibrated in two buffers following each pH measurement. Subsequent pH measurements on haemolymph or rectal secretion samples were then corrected for this drift using the new calibration curve. Electrodes showing deviations in calibration slope of more than  $\pm 2$  mV/pH unit were discarded.

**Haemolymph pH measurements.** Regulation of haemolymph pH was examined by transferring third and fourth instar larvae to high  $\text{HCO}_3^-$  and  $\text{CO}_3^{2-}$  media 4 days after hatching. Haemolymph samples were collected by briefly rinsing larvae in distilled water, blotting them dry and placing them under heavy paraffin oil (MCB Reagents; Saybolt viscosity 340–355). The cuticle was then torn with forceps and the drop of exuded haemolymph collected immediately in a mercury filled micropipette. This sample was transferred rapidly to a heavy paraffin oil bath (25 °C) and a capillary pH and 3 M-KCl microelectrode were lowered into the haemolymph drop visualized under a dissecting microscope. The potential difference between the electrodes was measured with a Keithley Model 602 electrometer and Model 6013 pH electrode adaptor and the voltage recorded on a Fisher Series 5000 Recordall.

**Haemolymph  $\text{HCO}_3^-$  measurements.** Haemolymph  $\text{HCO}_3^-$  was measured using the ultramicro Astrup method of Karlmark & Sohtell (1973). To equilibrate paraffin oil

Baths with gases of different  $\text{CO}_2$  content, we used high gas flow rates ( $2\text{--}3\text{ l. min}^{-1}$ ) and an equilibration time of at least 1 h before samples were added. Karlmark & Sohtell (1973) found that a minimum gas flow rate of  $450\text{ ml. min}^{-1}$  and a 30 min equilibration time were necessary for complete gas to oil equilibration. We confirmed this using an Orion  $P_{\text{CO}_2}$  electrode, but chose the higher flow rates to assure complete equilibration under all conditions. In addition, we found that complete gas to oil equilibration at  $25^\circ\text{C}$  was only obtained when light paraffin oil (MCB Reagents; Saybolt viscosity 90) was used.

Samples of haemolymph were collected for determination of  $\text{HCO}_3^-$ , as described above, and allowed to equilibrate with  $\text{CO}_2$  under oil for 20–30 min before pH measurements were made with capillary electrodes at  $25^\circ\text{C}$ . Gas flow was turned off briefly (less than 1 min) during sample loading and pH measurements. Different haemolymph samples were equilibrated with four gases of varying  $\text{CO}_2$  content (0.5–10%  $\text{CO}_2$ , balance  $\text{N}_2$ ; Canadian Liquid Air Company, certified analysis). Resulting pH versus  $\log P_{\text{CO}_2}$  titration curves were plotted using the least squares method of linear regression.

**Rectal micropuncture studies.** The micropuncture preparation used in this study was modified considerably from that described by Bradley & Phillips (1975). Briefly, the rectum was isolated by ligating the larvae just anterior to the seventh abdominal segment and also at the terminal anal segment. The portion of the larva anterior to the first ligature, the cuticle over the rectum, and the tracheal connections were then dissected away. Using the terminal ligature, the rectum was suspended in 10–15 ml of the appropriate physiological saline maintained at  $25^\circ\text{C}$  and gassed with 98%  $\text{O}_2$ –2%  $\text{CO}_2$ . After 90 min the rectum had swollen noticeably with secretion and was removed gently from the bath, touched lightly to bibulous paper to remove adhering external fluid, and placed under paraffin oil. Ten to 40 nl of rectal secretion were collected by puncturing recta with sharpened and bevelled ( $30^\circ$ , tip diameter of  $10\text{--}15\text{ }\mu$ ) acid-washed micropipettes filled with Sudan black-stained paraffin oil.

**Cannulated in vitro rectal preparation.** To examine rectal  $\text{HCO}_3^-$  secretion in greater detail, a microcannulated preparation was developed which permitted rapid and complete collection of secreted rectal fluid. Diagrams of the bathing chamber made from Sylgard 184 resin (Dow Corning) and the cannulated rectum are shown in Fig. 2(a) and (b). All cannulation experiments were conducted at room temperature ( $21\text{--}23^\circ\text{C}$ ) using larvae acclimated to  $250\text{ mM-HCO}_3^-$  medium.

Microcannulae were pulled on a small flame from glass tubing to tip diameters of  $35\text{--}50\text{ }\mu\text{m}$ . The tips of the pipettes were broken to the appropriate length with forceps and the broken end fire-polished with a microforge. Pipettes were siliconized with Dow Corning 1107 fluid, filled with Sudan black-stained paraffin oil and mounted on a Narishige micromanipulator using a micropipette holder (Leitz, Wetzlar, Germany) attached to a 50 ml syringe.

Recta were isolated by placing a larva in the bathing chamber and tying a fine ligature around the terminal anal segment. The bathing chamber was filled and perfused continuously with physiological saline and the rectum, ileum and a portion of the midgut were dissected free from the larva. Approximately 20–30 nl of saline were then drawn up into a microcannula and the pipette inserted down the midgut

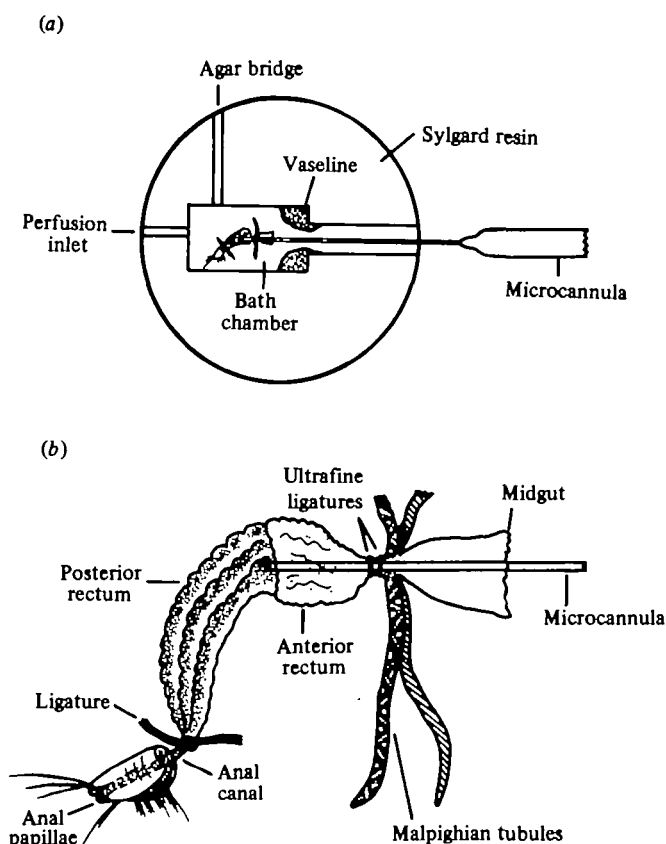

Fig. 2. Microcannulated rectal preparation. (a) Sylgard resin bathing chamber. (b) Cannulated rectal salt gland.

and into the rectum. The saline was injected into the rectum and then withdrawn completely and expelled into the bath. Having assured that the rectum was completely empty the microcannula was reinserted and tied into place using two ultrafine ligatures (diameter *ca.* 10  $\mu\text{m}$ ; see Fig. 2*b*).

During the course of these experiments the bathing chamber was perfused with saline gassed with 98%  $\text{O}_2$ –2%  $\text{CO}_2$  and recta were allowed to swell with secretion for 90 min before fluid was drawn into the cannula using the attached syringe. At the end of the experiments the bath was drained, the rectum removed from the pipette and the sample of secretion prepared for analysis.

*Analysis of rectal secretions.* Rectal secretion volume was determined by measuring drop diameters under paraffin oil as described by Bradley & Phillips (1975). Osmotic concentrations of rectal secretions were measured with a Clifton nanoliter osmometer. Concentrations of  $\text{Na}^+$ ,  $\text{K}^+$ ,  $\text{Mg}^{2+}$ ,  $\text{Ca}^{2+}$ ,  $\text{Cl}^-$ , total phosphorous and total sulphur were measured in each sample of secretion by electron microprobe analysis using a Cameca model MBX microprobe and methods described previously (Morel & Roinel, 1969; Roinel, 1975). Because of the high ion concentrations in rectal fluid, samples

Table 3. Values of  $pK_1'$ ,  $pK_2'$  and  $S$  used for calculation of  $\text{CO}_2$ ,  $\text{HCO}_3^-$  and  $\text{CO}_3^{2-}$  concentrations

| Constant               | Larval acclimation medium* |                                |                                   |
|------------------------|----------------------------|--------------------------------|-----------------------------------|
|                        | Rearing medium             | 250 mM $\text{HCO}_3^-$ medium | 100 mM- $\text{CO}_3^{2-}$ medium |
| Haemolymph ( $pK_1'$ ) | 6.12                       | 6.11                           | 6.11                              |
| Haemolymph ( $S$ )     | 0.0340                     | 0.0338                         | 0.0339                            |
| Secretion ( $pK_1'$ )† | 6.04                       | 6.04                           | 6.04                              |
| Secretion ( $S$ )†     | 0.0329                     | 0.0329                         | 0.0329                            |
| Secretion ( $pK_1'$ )‡ | —                          | 6.00                           | —                                 |
| Secretion ( $pK_1'$ )‡ | —                          | 9.64                           | —                                 |

\* See Table 1 for composition of acclimation media.

† Rectal secretion collected by micropuncture.

‡ Rectal secretion collected by microcannulation.

were diluted two to three times with distilled water before preparation for microprobe analysis. Chloride concentrations were also measured by the electrometric titration procedure of Ramsay, Brown & Croghan (1955) on rectal secretions pooled from four to five animals.

Bicarbonate concentrations in rectal secretions collected by micropuncture were estimated by measuring the pH of samples equilibrated under paraffin oil at 25 °C with 98%  $\text{O}_2$ -2%  $\text{CO}_2$  according to the methods described above. In later experiments, total  $\text{CO}_2$  and pH were measured in rectal secretions collected by microcannulation. Secretion pH was measured at 25 °C immediately after collection while total  $\text{CO}_2$  concentrations were determined by microcalorimetry (Picapnotherm; Micro-analytic Instrumentation, Bethesda, Maryland) as described by Vurek, Warnock & Corsey (1975). Aliquots of rectal secretion were transferred to the Picapnotherm by constant volume nanolitre pipettes (2-3 nl) similar to those of Prager, Bowman & Vurek (1965).

**Transepithelial potential.** Rectal transepithelial potential (TEP) was measured using a microcannula (see above) with 3 M-KCl-Agar in the tip and the remainder of the pipette filled with 3 M-KCl solution. The microcannula and bath chamber made contact via salt bridges to calomel electrodes and TEP was measured using a Keithley Model 602 electrometer. TEP was recorded continuously for 90 min on a Fisher Series 5000 Recordall with subsequent corrections for junction and asymmetry potentials.

**Calculations.** Concentrations of  $\text{CO}_2$ ,  $\text{HCO}_3^-$  and  $\text{CO}_3^{2-}$  were calculated from the Henderson-Hasselbalch equation after correcting  $pK_1'$ ,  $pK_2'$ , and  $\text{CO}_2$  solubility coefficients ( $S$ ) for ionic strength using the equations of Hastings & Sendroy (1925) and McGee & Hastings (1948). Values of  $pK_2'$ ,  $pK_1'$  and  $S$  used throughout this study are shown in Table 3.

## RESULTS

In preliminary studies we examined the ability of *A. dorsalis* larvae to survive in saline media buffered with low concentrations of  $\text{HCO}_3^-$  and  $\text{CO}_3^{2-}$  at high pH values. Larval survival and development were normal in media with pH values up to 10.5. At

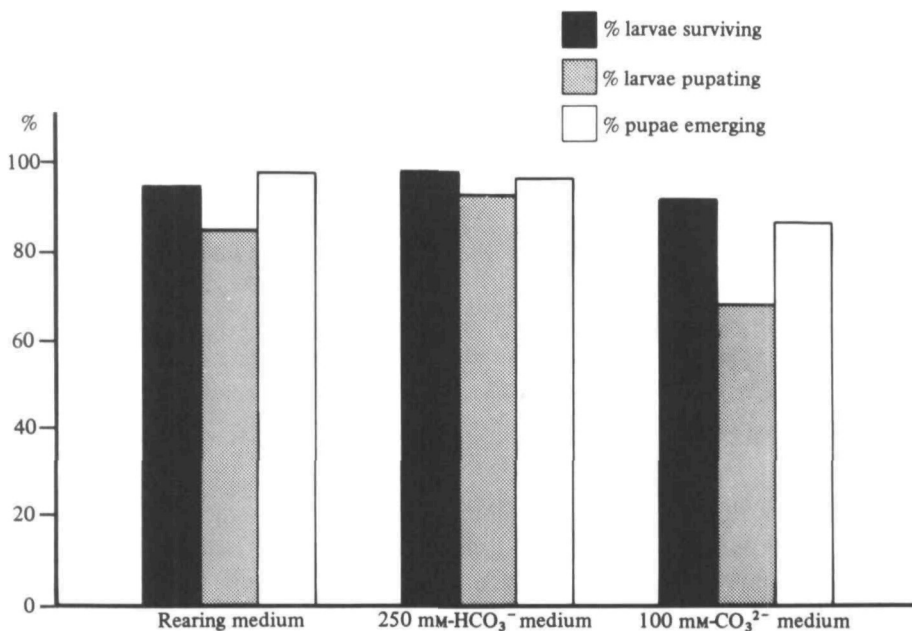

Fig. 3. Survival and development of fourth instar larvae in alkaline environments. Refer to Table 1 for media composition.

pH 11.0 survival was still normal but pupation and pupal-to-adult eclosion were greatly reduced. Since the pH of alkaline lakes rarely if ever rises above 10.5 due to the inherent nature of their buffering systems, factors other than pH *per se* must limit the distribution of larvae in natural alkaline waters. Further survival studies were therefore conducted by replacing NaCl in the Rearing medium with different concentrations of NaHCO<sub>3</sub> and/or Na<sub>2</sub>CO<sub>3</sub>. Fig. 3 demonstrates that survival and development are normal in media containing 250 mM-HCO<sub>3</sub><sup>-</sup> or 100 mM-CO<sub>3</sub><sup>2-</sup>. Slightly higher concentrations of these two ions (300 mM-HCO<sub>3</sub><sup>-</sup> and 150 mM-CO<sub>3</sub><sup>2-</sup>) resulted in greatly reduced survival (32–46% after 4 days) and failure of any of the larvae to develop past the pupal stage.

Ionic and osmotic concentrations of haemolymph from animals acclimated to high HCO<sub>3</sub><sup>-</sup> and CO<sub>3</sub><sup>2-</sup> environments are shown in Table 2. Haemolymph osmotic concentrations increased slightly but significantly ( $0.005 < P < 0.01$ ) from 359 to 401–432 m-osmol following transfer of larvae from the Rearing medium to either 250 mM-HCO<sub>3</sub><sup>-</sup> or 100 mM-CO<sub>3</sub><sup>2-</sup> medium. In addition, haemolymph Na<sup>+</sup> concentration increased significantly ( $P < 0.001$ ) from 163 to 181–190 mM, while Ca<sup>2+</sup> increased from 8.5 to 12.5–14.0 mM ( $P < 0.001$ ). Haemolymph Cl<sup>-</sup> concentration decreased slightly but significantly ( $0.001 < P < 0.005$ ) as external Cl<sup>-</sup> was replaced by HCO<sub>3</sub><sup>-</sup> and CO<sub>3</sub><sup>2-</sup>.

Fluid ingestion rate was measured to estimate the load imposed on pH and HCO<sub>3</sub><sup>-</sup> regulatory mechanisms in the larvae and to determine whether larvae could reduce this load by reducing drinking rate. Fig. 4 shows that drinking rate (53–56 nl.mg<sup>-1</sup>.h<sup>-1</sup>) was independent of external HCO<sub>3</sub><sup>-</sup> and CO<sub>3</sub><sup>2-</sup> levels.



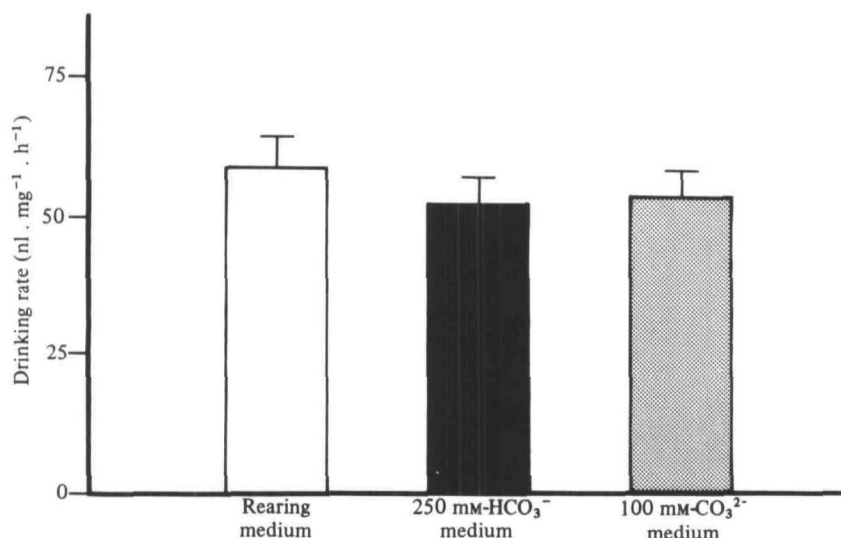

Fig. 4. Drinking rates estimated by [<sup>14</sup>C]inulin ingestion for fourth instar larvae acclimated to alkaline environments (means  $\pm$  S.E.,  $n = 10-12$ ). Refer to Table 1 for media composition.

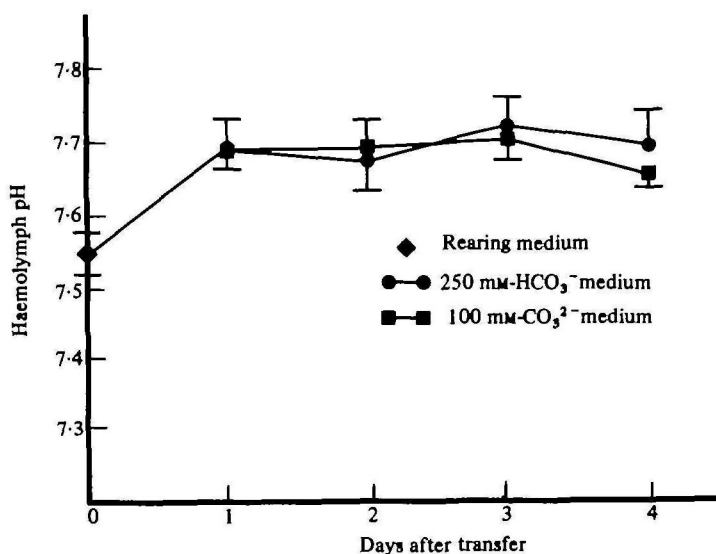

Fig. 5. Haemolymph pH regulation in fourth instar larvae during acclimation to high HCO<sub>3</sub><sup>-</sup> and CO<sub>3</sub><sup>2-</sup> media. Animals were transferred from the Rearing medium to 250 mM-HCO<sub>3</sub><sup>-</sup> or 100 mM-CO<sub>3</sub><sup>2-</sup> media at zero time (means  $\pm$  S.E.,  $n = 6-9$ ). Refer to Table 1 for media composition.

To determine how well larvae regulate haemolymph acid-base status when faced with such high ingestion rates, we measured haemolymph pH for 4 consecutive days following transfer of larvae from the Rearing medium to either high HCO<sub>3</sub><sup>-</sup> or high CO<sub>3</sub><sup>2-</sup> environments (Fig. 5). Haemolymph pH increased only slightly from 7.55 to 7.70 during the first day and remained constant thereafter.

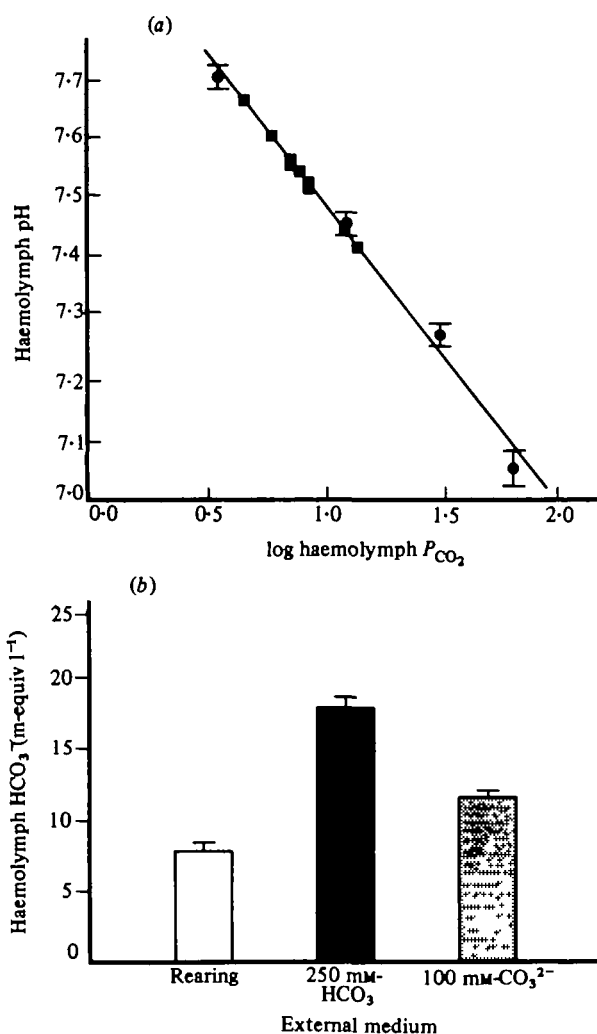

Fig. 6. Haemolymph  $HCO_3^-$  concentration. (a) pH v. log  $P_{CO_2}$  titration curve for haemolymph from animals acclimated to the Rearing medium. Solid circles are means  $\pm$  s.e. ( $n = 8-9$ ) of haemolymph samples titrated with one of four different  $CO_2$ - $N_2$  gas mixtures. The line is the linear regression calculated for these points ( $y = 0.51x + 8.03$ ;  $r = -0.994$ ). Solid squares are pH values of native haemolymph (see Fig. 5). The values were fitted to the line using the calculated regression equation. (b) Concentration of haemolymph  $HCO_3^-$  in animals acclimated to alkaline media.  $P_{CO_2}$  values were obtained from pH v. log  $P_{CO_2}$  titration curves and  $HCO_3^-$  concentration calculated using the Henderson-Hasselbalch equation (means  $\pm$  s.e.,  $n = 9-29$ ). Refer to Table 1 for media composition.

Haemolymph  $HCO_3^-$  concentration was determined in larvae acclimated to all three artificial waters (Fig. 6). A typical titration curve of haemolymph pH versus log haemolymph  $P_{CO_2}$  is shown in Fig. 6(a). Titration curves for the three groups of larvae were linear with correlation coefficients varying between  $-0.98$  and  $-0.99$ . Haemolymph  $P_{CO_2}$  was determined using these titration curves and the measured haemolymph pH values in Fig. 5.  $P_{CO_2}$  values were (in mm Hg, mean  $\pm$  s.e.,  $n = 9-29$ )

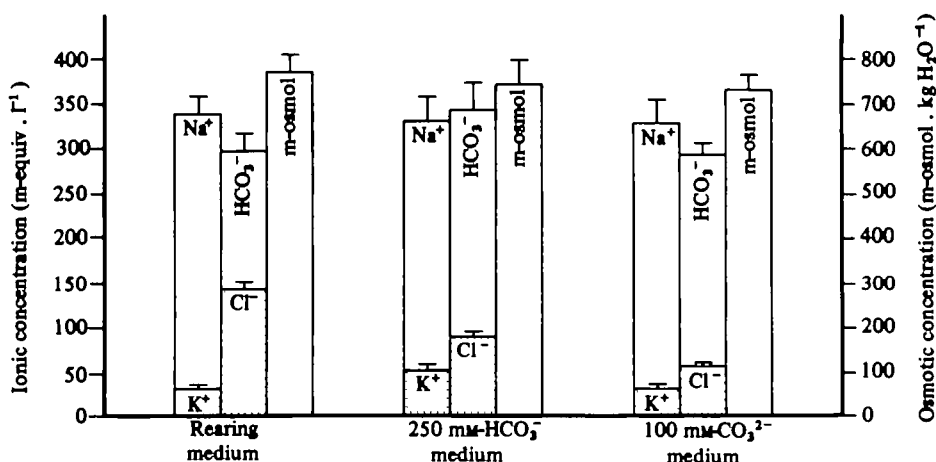

Fig. 7. Osmolarity and concentrations of major ions in rectal secretion collected by micropuncture from larvae acclimated to three different alkaline media (means  $\pm$  S.E.,  $n = 5-12$ ). See Tables 1 and 2 for composition of acclimation media and physiological salines.

$9.05 \pm 1.10$ ,  $14.79 \pm 1.33$  and  $9.44 \pm 0.50$  for animals acclimated to the Rearing, 250 mM-HCO<sub>3</sub><sup>-</sup> and 100 mM-CO<sub>3</sub><sup>2-</sup> media, respectively. Haemolymph  $P_{CO_2}$  was significantly higher ( $P < 0.001$ ) in animals acclimated to 250 mM-HCO<sub>3</sub><sup>-</sup> medium. Bicarbonate concentrations calculated from these data are shown in Fig. 6(b). Despite large increases in external HCO<sub>3</sub><sup>-</sup> and CO<sub>3</sub><sup>2-</sup> levels, haemolymph HCO<sub>3</sub><sup>-</sup> concentration remains low and only increase from 8.0 to 18.5 mM.

As previously described by Bradley & Phillips (1975, 1977a) for *Aedes taeniorhynchus* and *A. campestris* larvae from other hypersaline waters, the ligated rectum of *A. dorsalis* also swells with secretion when bathed in artificial haemolymphs. The osmotic and ionic concentrations of secretions collected by micropuncture of isolated recta are shown in Fig. 7. Mean Na<sup>+</sup> (270–300 mM) and osmotic (700–735 m-osmol) concentrations were essentially the same for larvae acclimated to the three external media. Mean chloride concentrations in rectal secretions increased from 50 mM to 135 mM, being lowest in animals acclimated to high HCO<sub>3</sub><sup>-</sup> and CO<sub>3</sub><sup>2-</sup> media. Concentrations of K<sup>+</sup> in rectal secretions were between 27 and 46.5 mM. Ca<sup>2+</sup> and Mg<sup>2+</sup> concentrations in secretions were very low (0.3–1.0 mM) while total phosphorus varied from 1.5 to 4.6 mM and total sulphur was ca. 8.0 mM (Table 4).

Osmotic and ionic concentrations of rectal secretions collected from microcannulated recta of larvae acclimated to 250 mM-HCO<sub>3</sub><sup>-</sup> medium are shown in Fig. 8 and were significantly higher than those of secretions collected by micropuncture (cf. Fig. 7). Mean osmotic concentration was 1030 m-osmol, while mean Na<sup>+</sup>, K<sup>+</sup> and Cl<sup>-</sup> concentrations were 413 mM, 31.4 mM and 44.9 mM, respectively. Concentrations of Ca<sup>2+</sup> and Mg<sup>2+</sup> were again very low (0.5–0.8 mM) while total phosphorus levels were 2.4 mM and total sulphur was 13.4 mM (data not shown).

The major objective of our micropuncture studies was simply to determine whether the rectum was an important site of HCO<sub>3</sub><sup>-</sup> excretion and regulation. Bicarbonate concentrations were thus initially estimated by measuring the pH at a known CO<sub>2</sub>

Table 4. Concentrations of  $\text{Ca}^{2+}$ ,  $\text{Mg}^{2+}$ , total sulphur and total phosphorus and pH in rectal secretions collected by micropuncture

(pH values were determined on secretions equilibrated with 2%  $\text{CO}_2$ ; mean  $\pm$  s.e.,  $n = 7-11$ ).

| Constituent (mm) | Larval acclimation medium* |                                 |                                   |
|------------------|----------------------------|---------------------------------|-----------------------------------|
|                  | Rearing medium             | 250 mm- $\text{HCO}_3^-$ medium | 100 mm- $\text{CO}_3^{2-}$ medium |
| $\text{Mg}^{2+}$ | $0.77 \pm 0.11$            | $1.04 \pm 0.26$                 | —                                 |
| $\text{Ca}^{2+}$ | $0.34 \pm 0.04$            | $0.76 \pm 0.22$                 | —                                 |
| Total sulfur     | $7.85 \pm 0.81$            | $8.90 \pm 1.84$                 | —                                 |
| Total phosphorus | $4.63 \pm 1.03$            | $3.61 \pm 1.64$                 | $1.49 \pm 0.30$                   |
| pH               | $8.43 \pm 0.04$            | $8.72 \pm 0.05$                 | $8.72 \pm 0.03$                   |

\* See Table 1 for composition of acclimation media.

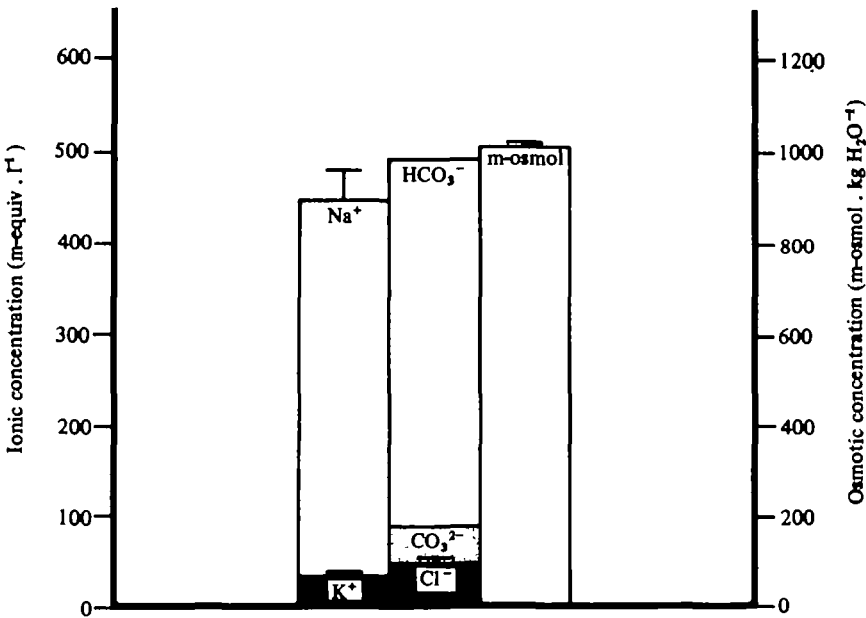

Fig. 8. Osmolarity and concentrations of major ions in rectal secretion collected from cannulated recta of animals acclimated to 250 mm- $\text{HCO}_3^-$  medium (see Table 1). Values are means  $\pm$  s.e.,  $n = 8-9$ . Concentrations of  $\text{HCO}_3^-$  and  $\text{CO}_3^{2-}$  are calculated from measurements of total  $\text{CO}_2$  and pH as described in the text.

tension of rectal secretions collected by micropuncture. This method is the same as that used in early work on the kidney (Gottschalk, Lassiter & Mylle, 1960; Viera & Malnic, 1968) and pancreas (Swanson & Solomon, 1973) and is based on the assumption that luminal  $P_{\text{CO}_2}$  is the same as that in the haemolymph (i.e. 2.0%  $\text{CO}_2$ ). The concentrations of  $\text{HCO}_3^-$  calculated from the Henderson-Hasselbalch equation using the measured pH and known  $P_{\text{CO}_2}$  are shown in Fig. 7 and ranged between 150 and 240 mM.

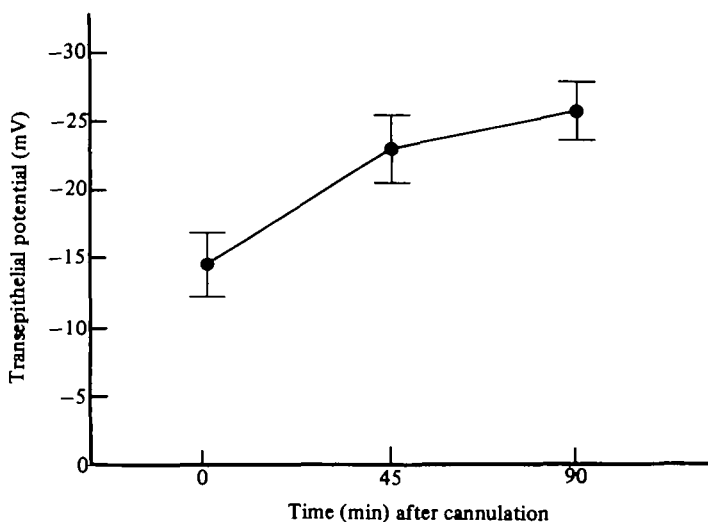

Fig. 9. Transepithelial potential (lumen relative to haemocoel side) across cannulated recta from animals acclimated to 250 mM- $\text{HCO}_3^-$  medium (see Table 1). Values are means  $\pm$  S.E.,  $n = 6$ .

It must be stressed here that the calculated  $\text{HCO}_3^-$  levels shown in Fig. 7 are slight overestimates of actual concentrations. At the pH values of the rectal secretions (8.4–8.7; Table 4) a significant fraction of the total  $\text{CO}_2$  pool is present as  $\text{CO}_3^{2-}$  which cannot be calculated directly from the Henderson–Hasselbalch equation using only known pH and  $P_{\text{CO}_2}$  values. To determine actual  $\text{HCO}_3^-$  and  $\text{CO}_3^{2-}$  concentrations in rectal secretion and to calculate transepithelial  $\text{HCO}_3^-$  and  $\text{CO}_3^{2-}$  gradients across the rectal wall, we subsequently measured total  $\text{CO}_2$  in secretions collected from cannulated recta of animals acclimated to 250 mM- $\text{HCO}_3^-$  medium. The total  $\text{CO}_2$  concentration in these secretions was  $444 \pm 25$  mM (mean  $\pm$  S.E.,  $n = 6$ ) while pH was  $8.65 \pm 0.05$  (mean  $\pm$  S.E.,  $n = 7$ ). Using these measured values, concentrations of  $\text{CO}_2$ ,  $\text{HCO}_3^-$  and  $\text{CO}_3^{2-}$  were calculated from the Henderson–Hasselbalch equation and were 0.90 mM, 402 mM and 41 mM, respectively (see Fig. 8).

Secretion rate was estimated in cannulated recta by measuring the volume of collected fluid and was  $37.6 \pm 6.4$  nl.  $\text{h}^{-1}$ . rectum $^{-1}$  (mean  $\pm$  S.E.,  $n = 6$ ). The calculated total  $\text{CO}_2$  secretion rate in cannulated recta was 16.7 nmoles total  $\text{CO}_2$ .  $\text{h}^{-1}$ . rectum $^{-1}$ .

Transepithelial potentials across cannulated recta are shown in Fig. 9. Immediately after ligation, mean TEP was  $-14.2$  mV (lumen negative). During the course of the experiment, TEP gradually increased as the rectum swelled with secretion and reached a value of  $-25.3$  mV (lumen negative) after 90 min.

#### DISCUSSION

The results of survival studies indicate that *A. dorsalis* larvae survive and develop normally in concentrated  $\text{NaHCO}_3$ – $\text{CO}_2$  media and that the distribution of this species in alkaline lakes is limited not by high pH *per se*, but instead by the concentrations of

$\text{HCO}_3^-$  and  $\text{CO}_3^{2-}$  in these environments. Larvae inhabiting alkaline waters ingest the external medium at a rate equivalent to *ca.* 130% of their body wt/day. The degree of haemolymph pH and  $\text{HCO}_3^-$  regulation exhibited by these insects (Figs. 5, 6) is remarkable considering the acid-base regulatory problems which must be imposed by such high rates of fluid ingestion.

The elevated haemolymph  $P_{\text{CO}_2}$  observed in animals acclimated to 250 mM- $\text{HCO}_3^-$  medium (see Results) is difficult to explain at present, but may represent an attempt of the larvae to retain  $\text{CO}_2$  so as to lower haemolymph pH. This could be a valuable regulatory response, especially if the excretory system is not capable of eliminating  $\text{HCO}_3^-$  rapidly enough to maintain haemolymph pH within physiological limits. Alternatively, this elevated  $P_{\text{CO}_2}$  value could arise from passive processes and largely be a result of a leftward shift of the  $\text{CO}_2$ - $\text{HCO}_3^-$  equilibrium as ingested  $\text{HCO}_3^-$  rapidly enters the haemolymph.

Larval haemolymph exhibits a large inorganic anion deficit (Table 2), which is characteristic of dipteran haemolymph and is due to the presence of large concentrations of organic acids (Florkin & Jeuniaux, 1964). This inorganic anion deficit increased as haemolymph  $\text{Na}^+$  concentrations increased and  $\text{Cl}^-$  levels dropped when larvae were acclimated to high  $\text{HCO}_3^-$  and  $\text{CO}_3^{2-}$  media (Table 2). If organic acids account for this deficit, then an increase in these compounds would not only maintain haemolymph electroneutrality, but may also enhance haemolymph buffering capacity necessary to counter short-term alkaline shifts in haemolymph pH.

Haemolymph  $\text{Ca}^{2+}$  concentrations (Table 2) also increased when larvae were acclimated to 250 mM- $\text{HCO}_3^-$  or 100 mM- $\text{CO}_3^{2-}$  media. The rise in  $\text{Ca}^{2+}$  levels may reflect changes in the amount of  $\text{Ca}^{2+}$  bound to organic molecules. In addition, elevated haemolymph pH may increase  $\text{Ca}^{2+}$  complexation and precipitation, making it necessary for larvae to increase total haemolymph  $\text{Ca}^{2+}$  concentration as a means of regulating  $\text{Ca}^{2+}$  activity.

#### *Rectal $\text{HCO}_3^-$ secretion*

The function of the rectum of saline water mosquito larvae in osmoregulation has recently been described in detail (Bradley & Phillips, 1975, 1977*a-c*). Briefly, the rectum is composed of two ultrastructurally distinct segments (Meredith & Phillips, 1973; cf. Fig. 2*b*) and is functionally analogous to avian and reptilian salt glands. When larvae are acclimated to hypersaline media, the posterior rectal segment produces a strongly hyperosmotic secretion with ion ratios and total osmotic concentrations reflecting those found in the environment (Bradley & Phillips, 1975, 1977*a,b*). This segment is the major site of  $\text{Na}^+$ ,  $\text{Mg}^{2+}$  and  $\text{Cl}^-$  regulation in saline waters (Bradley & Phillips, 1977*a*). Bradley & Phillips (1977*c*) suggest that the anterior rectum is involved in selective reabsorption of solutes and water.

Data from micropuncture studies (Fig. 7 and Table 4) demonstrate clearly that the rectum, presumably the posterior segment, is also an important site of  $\text{HCO}_3^-$  excretion and regulation as originally suggested by Bradley & Phillips (1977*a*). Larvae acclimated to 250 mM- $\text{HCO}_3^-$  and 100 mM- $\text{CO}_3^{2-}$  media produce rectal secretions with significantly higher concentrations of  $\text{HCO}_3^-$  than animals acclimated to the Rearing medium.

The total osmotic and ionic concentrations of secretions collected by micro-

annulation were considerably higher than those of secretions collected by micro-puncture (cf. Figs. 7 and 8). The most likely explanation for this discrepancy is related to the differences between the two isolated rectal preparations used. With the micro-puncture preparation it is possible that small amounts of relatively dilute midgut and Malpighian tubule fluid remain in the rectum after ligation, even though the larvae normally empty the rectum when handled (Bradley & Phillips, 1975; K. Strange, unpublished observations). When using the cannulated preparation, however, it was always possible to rinse and then empty the rectum completely before the start of any experiment. This presumably results in the collection of pure rectal secretion.

Data from microcannulation studies allowed determination of transrectal  $\text{HCO}_3^-$  and  $\text{CO}_3^{2-}$  gradients. Lumen-to-haemocoel side  $\text{HCO}_3^-$  and  $\text{CO}_3^{2-}$  ratios of 21:1 and 241:1, respectively, were calculated using results shown in Fig. 8. In addition, the calculated luminal  $\text{CO}_2$  concentration (see Results) was slightly higher than that in the bath, giving a lumen-to-haemocoel  $\text{CO}_2$  ratio of 1.8:1.

To generate the observed  $\text{HCO}_3^-$  and  $\text{CO}_3^{2-}$  gradients by passive mechanisms, a transepithelial potential of +69 mV to +76 mV (lumen positive) would be required as calculated from the Nernst equation. The measured rectal TEP (Fig. 9) varied between -14 and -25 mV (lumen negative) demonstrating clearly that  $\text{HCO}_3^-$  transport occurs by an energy-dependent process.

In conclusion, it is clear from these studies that the rectal salt gland is an important site of  $\text{HCO}_3^-$  excretion and regulation in mosquito larvae inhabiting  $\text{NaHCO}_3$ - $\text{CO}_2$  waters. An *in vitro* microperfusion system has recently been developed (K. Strange, in preparation) and is currently being used to characterize the cellular mechanisms of rectal  $\text{HCO}_3^-$  secretion.

We thank Dr William Milsom for critically reviewing the manuscript and Ms Joan Martin and Dr Mary Chamberlin for assistance with the art work. We also thank Mr Michael Turell for the gift of *A. dorsalis* eggs. The invaluable technical assistance of Ms Christine McCaffrey and Margaret Muhler in electron microprobe analyses is gratefully acknowledged. Supported by NSERC (Canada).

#### REFERENCES

- BLINN, D. W. (1969). Autoecology of *Ctenocladus* (Chlorophyceae) in saline environments. Ph.D. thesis, University of British Columbia, Vancouver. 135 pp.
- BRADLEY, T. J. (1976). The mechanism of hyperosmotic urine formation in the recta of saline-water mosquito larvae. Ph.D. thesis, University of British Columbia, Vancouver.
- BRADLEY, T. J. & PHILLIPS, J. E. (1975). The secretion of hyperosmotic fluid by the rectum of a saline-water mosquito larva, *Aedes taeniorhynchus*. *J. exp. Biol.* **63**, 331-342.
- BRADLEY, T. J. & PHILLIPS, J. E. (1977a). Regulation of rectal secretion in saline-water mosquito larvae living in waters of diverse ionic composition. *J. exp. Biol.* **66**, 83-96.
- BRADLEY, T. J. & PHILLIPS, J. E. (1977b). The effect of external salinity on drinking rate and rectal secretion in the larvae of the saline-water mosquito *Aedes taeniorhynchus*. *J. exp. Biol.* **66**, 97-110.
- BRADLEY, T. J. & PHILLIPS, J. E. (1977c). The location and mechanism of hyperosmotic fluid secretion in the rectum of the saline-water mosquito larvae *Aedes taeniorhynchus*. *J. exp. Biol.* **66**, 111-126.
- CRAIG, R. & CLARK, J. R. (1938). The hydrogen ion concentration and buffer value of the blood of larvae of *Pieris rapae* (L.) and *Heliothis obsoleta* (F.). *J. Econ. Ent.* **31**, 51-54.
- FLORKIN, M. & CH. JEUNIAUX (1964). Hemolymph: Composition. In *The Physiology of Insecta*, vol. III (ed. M. Rockstein), pp. 109-152. New York: Academic Press.

- GOTTSCHALK, C. W., LASSITER, W. E. & MYLLE, M. (1960). Localization of urine acidification in the mammalian kidney. *Am. J. Physiol.* **198**, 581-585.
- HASTINGS, A. B. & SENDROY, J. (1925). The effect of variation in ionic strength on the apparent first and second dissociation constants of carbonic acid. *J. biol. Chem.* **65**, 445-455.
- HASTINGS, E. & PEPPER, J. N. (1943). Studies on body fluids of seven orthopterans, their pH, buffering capacity, and effect on solubility of fractionated insecticides. *J. Econ. Ent.* **36**, 857-864.
- JOHANSEN, K., MALOY, G. M. O. & LYKKEBOE, G. (1975). A fish in extreme alkalinity. *Resp. Physiol.* **24**, 159-162.
- KARLMARK, B. & SOHTELL, M. (1973). The determination of bicarbonate in nanoliter samples. *Analyt. Biochem.* **53**, 1-11.
- KHURI, R. N., AGULIAN, S. K. & HARIK, S. I. (1968). Internal capillary glass microelectrodes with a glass seal for pH, sodium and potassium. *Pflügers Arch.* **301**, 182-186.
- LEVENBOOK, L. (1950a). The physiology of carbon dioxide transport in insect blood. Part I. The form of carbon dioxide present in *Gastrophilus* larva blood. *J. exp. Biol.* **27**, 158-174.
- LEVENBOOK, L. (1950b). The physiology of carbon dioxide transport in insect blood. Part III. The buffer capacity of *Gastrophilus* blood. *J. exp. Biol.* **27**, 184-191.
- LYKKEBOE, G. & JOHANSEN, K. (1975). Functional properties of haemoglobins in the teleost *Tilapia grahami*. *J. comp. Physiol.* **104**, 1-11.
- MAETZ, J. & DERENZIS, G. (1978). Aspects of the adaptation of fish to high external alkalinity: Comparison of *Tilapia grahami* and *T. mossambica*. In *Comparative Physiology - Water, Ions and Fluid Mechanics* (ed. K. Schmidt-Nielsen, L. Bolis and S. H. P. Maddrell), pp. 213-228. Cambridge University Press.
- MALOY, G. M. C., LYKKEBOE, G., JOHANSEN, K. & BAMFORD, O. S. (1978). Osmoregulation in *Tilapia grahami*: A fish in extreme alkalinity. In *Comparative Physiology - Water, Ions and Fluid Mechanics* (ed. K. Schmidt-Nielsen, L. Bolis and S. H. P. Maddrell), pp. 229-238. Cambridge University Press.
- MCGEE, L. C. & HASTINGS, A. B. (1942). The carbon dioxide tension and acid-base balance of jejunal secretions in man. *J. biol. Chem.* **142**, 893-904.
- MEREDITH, J. & PHILLIPS, J. E. (1973). Rectal ultrastructure in salt- and freshwater mosquito larvae in relation to physiological state. *Z. Zellforsch.* **132**, 1-22.
- MOREL, F. & ROINEL, M. (1969). Application de la microsonde électronique à l'analyse élémentaire quantitative d'échantillons liquides d'un volume inférieur à  $10^{-9}$  l. *J. Chim. phys.* **66**, 1084-1091.
- PHILLIPS, J. E. & BRADLEY, T. J. (1977). Osmotic and ionic regulation in saline-water mosquito larvae. In *Transport of Ions and Water in Animals* (ed. B. L. Gupta, R. B. Moreton, J. L. Oschman and B. J. Wall), pp. 709-734. New York: Academic Press.
- PHILLIPS, J. E., BRADLEY, T. J. & MADDRELL, S. H. P. (1978). Mechanisms of ionic and osmotic regulation in saline-water mosquito larvae. In *Comparative Physiology - Water, Ions and Fluid Mechanics* (ed. K. Schmidt-Nielsen, L. Bolis, and S. H. P. Maddrell), pp. 151-171. Cambridge: Cambridge University Press.
- PRAGER, D. J., BOWMAN, R. L. & VUREK, G. G. (1965). Constant volume, self-filling nanoliter pipette: construction and calibration. *Science, N.Y.* **147**, 606-608.
- RAMSAY, J. A., BROWN, R. H. J. & CROGHAN, P. C. (1955). Electrometric titration of chloride in small volumes. *J. exp. Biol.* **32**, 822-829.
- REITE, O. B., MALOY, G. M. O. & AASEHAUG, B. (1974). pH, salinity and temperature tolerance of Lake Magadi *Tilapia*. *Nature, Lond.* **247**, 315.
- RIONEL, M. (1975). Electron microprobe quantitative analysis of lyophilised  $10^{-10}$  l volume samples. *J. Microsc. Cell. Biol.* **22**, 261-267.
- SCUDDER, G. G. E. (1969). The fauna of saline lakes on the Fraser Plateau in British Columbia. *Verh. int. Verein. Limnol.* **17**, 430-439.
- SWANSON, C. H. & SOLOMON, A. K. (1973). A micropuncture investigation of the whole tissue mechanisms of electrolyte secretion by the *in vitro* rabbit pancreas. *J. gen. Physiol.* **62**, 407-429.
- TOPPING, M. S. & SCUDDER, G. G. E. (1977). Some physical and chemical features of saline lakes in central British Columbia. *Syneris* **10**, 145-166.
- VIERA, F. L. & MALNIC, G. (1968). Hydrogen ion secretion by rat renal cortical tubules as studied by an antimony microelectrode. *Am. J. Physiol.* **214**, 710-718.
- VUREK, G. G., WARNOCK, D. G. & CORSEY, R. (1975). Measurement of picomole amounts of carbon dioxide by calorimetry. *Analyt. Chem.* **47**, 765-767.
